# Supplementary material for: Scaling up the primary health integrated care project for chronic conditions in Kenya: study protocol for an implementation research project
Source: HighWire-hosted journal article supplement (doi:10.1136/bmjopen-2021-056261), 2022-03-01
Supplement: bmjopen-2021-056261supp001_data_supplement.pdf [file bmjopen-2021-056261supp001_data_supplement.pdf]

## Scaling up the Primary Health Integrated Care Project for Chronic Conditions in Kenya: Study Protocol for an implementation research project

### Appendix

**Table A.1 Key features of Busia and Trans Nzoia counties (2018)**

| Characteristics                                                       | Busia county                                                                                         | Trans Nzoia county                                                                                                    |
|-----------------------------------------------------------------------|------------------------------------------------------------------------------------------------------|-----------------------------------------------------------------------------------------------------------------------|
| <b>Population</b>                                                     | 893,681*                                                                                             | 990,341*                                                                                                              |
| <b>% population aged 15+ years</b>                                    | 52%                                                                                                  | 53%                                                                                                                   |
| <b>% females</b>                                                      | 52%                                                                                                  | 51%                                                                                                                   |
| <b>Live expectancy at birth</b>                                       | 47 years                                                                                             | 60.5 years                                                                                                            |
| <b>Poverty level</b>                                                  | 64%                                                                                                  | 50%                                                                                                                   |
| <b>Estimated hypertension prevalence</b>                              | 22%                                                                                                  | 27%                                                                                                                   |
| <b>Estimated diabetes prevalence</b>                                  | 1.5%                                                                                                 | 2%                                                                                                                    |
| <b>NHIF coverage</b>                                                  | 31%                                                                                                  | 20%                                                                                                                   |
| <b>Number of public health facilities</b>                             | 184 community units served by 47 dispensaries, 12 health centers, 5 sub-county and 1 county hospital | 198 community units served by 38 dispensaries, 8 health centers, 6 sub-county health facilities and 1 county hospital |
| <b>Number of patients with selected NCDs serviced in AMPATH sites</b> | 6060 patients with hypertension, 1113 with diabetes and 200 with cervical cancer.                    | 4,375 patients with hypertension, and 2,089 with diabetes.                                                            |

Sources: PIC4C project protocol (2018, unpublished); \* Kenya National Bureau of Statistics (2019). Kenya Population and Housing Census. <https://kenya.opendataforafrica.org/msdpnbc/2019-kenya-population-and-housing-census-population-by-county-and-sub-county?county=1003270-busia> (last accessed 20 March 2021).
